# Supplementary material for: Choline chloride plus glycerol deep eutectic solvents as non-aqueous absorbents for the efficient absorption and recovery of HCl gas
Source: Royal Society of Chemistry journal article supplement (doi:10.1039/d1nj06231j), 2023-01-01
Supplement: d1nj06231j1.pdf [file d1nj06231j1.pdf]

**Choline chloride plus glycerol deep eutectic solvents as non-aqueous absorbents  
for efficient absorption and recovery of HCl gas**

Zi-Teng Gao, Zhang-Min Li, Yan Zhou, Xue-Jun Shu, Zhao-Hui Xu, Duan-Jian Tao\*

*National Engineering Research Center for Carbohydrate Synthesis, Key Laboratory of  
Fluorine and Silicon for Energy Materials and Chemistry of Ministry of Education,  
College of Chemistry and Chemical Engineering, Jiangxi Normal University,  
Nanchang 330022 China.*

\*Corresponding author: E-mail: [djtao@jxnu.edu.cn](mailto:djtao@jxnu.edu.cn) (D. Tao)

### HCl solubilities data

| 298.2 K, 1 bar                           | Mass (g) |                                  |            |
|------------------------------------------|----------|----------------------------------|------------|
| ChCl-Gly (1:1.5)                         | 2.2671   |                                  |            |
| glass container                          | 62.5564  |                                  |            |
| glass container+<br>ChCl-Gly (1:1.5)     | 64.8235  |                                  |            |
| glass container+<br>ChCl-Gly (1:1.5)+HCl | /        | HCl solubility<br>(g HCl/g DESs) | time (min) |
| 15 v/v% HCl, 85 v/v% N <sub>2</sub>      | 65.0570  | 0.103                            | 10         |
|                                          | 65.1522  | 0.145                            | 20         |
|                                          | 65.2001  | 0.166                            | 30         |
|                                          | 65.2198  | 0.175                            | 40         |
|                                          | 65.2204  | 0.175                            | 50         |
|                                          | 65.2203  | 0.175                            | 60         |
| 30 v/v% HCl, 70 v/v% N <sub>2</sub>      | 65.2876  | 0.205                            | 30         |
|                                          | 65.2874  | 0.205                            | 40         |
|                                          | 65.2881  | 0.205                            | 50         |
| 40 v/v% HCl, 60 v/v% N <sub>2</sub>      | 65.3239  | 0.221                            | 30         |
|                                          | 65.3246  | 0.221                            | 40         |
|                                          | 65.3244  | 0.221                            | 50         |
| 50 v/v% HCl, 50 v/v% N <sub>2</sub>      | 65.3713  | 0.242                            | 30         |
|                                          | 65.3720  | 0.242                            | 40         |
|                                          | 65.3721  | 0.242                            | 50         |
| 60 v/v% HCl, 40 v/v% N <sub>2</sub>      | 65.4061  | 0.257                            | 30         |
|                                          | 65.4060  | 0.257                            | 40         |
|                                          | 65.4060  | 0.257                            | 50         |
| 80 v/v% HCl, 20 v/v% N <sub>2</sub>      | 65.4854  | 0.292                            | 30         |
|                                          | 65.4855  | 0.292                            | 40         |
|                                          | 65.4853  | 0.292                            | 50         |
| 100 v/v% HCl                             | 65.5104  | 0.303                            | 20         |
|                                          | 65.5104  | 0.303                            | 30         |
|                                          | 65.5103  | 0.303                            | 40         |
|                                          | 65.5104  | 0.303                            | 50         |

|                                          |                 |                                  |            |
|------------------------------------------|-----------------|----------------------------------|------------|
| <b>313.2 K, 1 bar</b>                    | <b>Mass (g)</b> |                                  |            |
| <b>ChCl-Gly (1:1.5)</b>                  | 2.4017          |                                  |            |
| glass container                          | 62.5559         |                                  |            |
| glass container+<br>ChCl-Gly (1:1.5)     | 64.9576         |                                  |            |
| glass container+<br>ChCl-Gly (1:1.5)+HCl | /               | HCl solubility<br>(g HCl/g DESs) | time (min) |
| 15 v/v% HCl, 85 v/v% N <sub>2</sub>      | 65.2023         | 0.102                            | 10         |
|                                          | 65.2755         | 0.132                            | 20         |
|                                          | 65.277          | 0.133                            | 30         |
|                                          | 65.2771         | 0.133                            | 40         |
| 30 v/v% HCl, 70 v/v% N <sub>2</sub>      | 65.3539         | 0.165                            | 20         |
|                                          | 65.3538         | 0.165                            | 30         |
|                                          | 65.3539         | 0.165                            | 40         |
| 40 v/v% HCl, 60 v/v% N <sub>2</sub>      | 65.3785         | 0.175                            | 20         |
|                                          | 65.3781         | 0.175                            | 30         |
|                                          | 65.3786         | 0.175                            | 40         |
| 50 v/v% HCl, 50 v/v% N <sub>2</sub>      | 65.4235         | 0.194                            | 20         |
|                                          | 65.4233         | 0.194                            | 30         |
|                                          | 65.4238         | 0.194                            | 40         |
| 60 v/v% HCl, 40 v/v% N <sub>2</sub>      | 65.4763         | 0.216                            | 20         |
|                                          | 65.4759         | 0.216                            | 30         |
|                                          | 65.4761         | 0.216                            | 40         |
| 80 v/v% HCl, 20 v/v% N <sub>2</sub>      | 65.5124         | 0.231                            | 20         |
|                                          | 65.5119         | 0.231                            | 30         |
|                                          | 65.5121         | 0.231                            | 40         |
| 100 v/v% HCl                             | 65.5384         | 0.242                            | 20         |
|                                          | 65.5379         | 0.242                            | 30         |
|                                          | 65.5381         | 0.242                            | 40         |

|                                          |          |                                  |            |
|------------------------------------------|----------|----------------------------------|------------|
| <b>323.2 K, 1 bar</b>                    | Mass (g) |                                  |            |
| <b>ChCl-Gly (1:1.5)</b>                  | 2.202    |                                  |            |
| glass container                          | 62.5553  |                                  |            |
| glass container+<br>ChCl-Gly (1:1.5)     | 64.7573  |                                  |            |
| glass container+<br>ChCl-Gly (1:1.5)+HCl | /        | HCl solubility<br>(g HCl/g DESs) | time (min) |
| 15 v/v% HCl, 85 v/v% N <sub>2</sub>      | 64.9811  | 0.102                            | 10         |
|                                          | 64.9820  | 0.102                            | 20         |
|                                          | 64.9821  | 0.102                            | 30         |
| 30 v/v% HCl, 70 v/v% N <sub>2</sub>      | 65.0571  | 0.136                            | 10         |
|                                          | 65.0568  | 0.136                            | 20         |
|                                          | 65.0569  | 0.136                            | 30         |
| 40 v/v% HCl, 60 v/v% N <sub>2</sub>      | 65.0722  | 0.143                            | 10         |
|                                          | 65.0716  | 0.143                            | 20         |
|                                          | 65.0721  | 0.143                            | 30         |
| 50 v/v% HCl, 50 v/v% N <sub>2</sub>      | 65.1118  | 0.161                            | 10         |
|                                          | 65.1120  | 0.161                            | 20         |
|                                          | 65.1116  | 0.161                            | 30         |
| 60 v/v% HCl, 40 v/v% N <sub>2</sub>      | 65.1537  | 0.180                            | 10         |
|                                          | 65.1541  | 0.180                            | 20         |
|                                          | 65.1538  | 0.180                            | 30         |
| 80 v/v% HCl, 20 v/v% N <sub>2</sub>      | 65.1769  | 0.191                            | 10         |
|                                          | 65.1776  | 0.191                            | 20         |
|                                          | 65.1775  | 0.191                            | 30         |
| 100 v/v% HCl                             | 65.2157  | 0.208                            | 10         |
|                                          | 65.2149  | 0.208                            | 20         |
|                                          | 65.2155  | 0.208                            | 30         |

|                                          |                 |                                  |            |
|------------------------------------------|-----------------|----------------------------------|------------|
| <b>333.2 K, 1 bar</b>                    | <b>Mass (g)</b> |                                  |            |
| <b>ChCl-Gly (1:1.5)</b>                  | 2.1403          |                                  |            |
| glass container                          | 62.5561         |                                  |            |
| glass container+<br>ChCl-Gly (1:1.5)     | 64.6964         |                                  |            |
| glass container+<br>ChCl-Gly (1:1.5)+HCl | /               | HCl solubility<br>(g HCl/g DESs) | time (min) |
| 15 v/v% HCl, 85 v/v% N <sub>2</sub>      | 64.8655         | 0.079                            | 10         |
|                                          | 64.8653         | 0.079                            | 20         |
|                                          | 64.8649         | 0.079                            | 30         |
| 30 v/v% HCl, 70 v/v% N <sub>2</sub>      | 64.9361         | 0.112                            | 10         |
|                                          | 64.9358         | 0.112                            | 20         |
|                                          | 64.9359         | 0.112                            | 30         |
| 40 v/v% HCl, 60 v/v% N <sub>2</sub>      | 64.9638         | 0.125                            | 10         |
|                                          | 64.9640         | 0.125                            | 20         |
|                                          | 64.9641         | 0.125                            | 30         |
| 50 v/v% HCl, 50 v/v% N <sub>2</sub>      | 64.9874         | 0.136                            | 10         |
|                                          | 64.9879         | 0.136                            | 20         |
|                                          | 64.9875         | 0.136                            | 30         |
| 60 v/v% HCl, 40 v/v% N <sub>2</sub>      | 65.0367         | 0.159                            | 10         |
|                                          | 65.0371         | 0.159                            | 20         |
|                                          | 65.0372         | 0.159                            | 30         |
| 80 v/v% HCl, 20 v/v% N <sub>2</sub>      | 65.0453         | 0.163                            | 10         |
|                                          | 65.0451         | 0.163                            | 20         |
|                                          | 65.0451         | 0.163                            | 30         |
| 100 v/v% HCl                             | 65.0710         | 0.175                            | 10         |
|                                          | 65.0699         | 0.175                            | 20         |
|                                          | 65.0711         | 0.175                            | 30         |
